# Supplementary material for: Long-Term Mortality in Critically Ill Tracheostomized Patients Based on Home Mechanical Ventilation at Discharge
Source: MDPI journal article supplement (doi:10.3390/jpm11121257), 2021-11-25
Supplement: s1 [file s1]

## Supplementary Material

**Table S1.** Comparison between the mechanically ventilated patients who received a tracheostomy according to the 1-yr mortality and 1-yr survival.

| Variables                               | 1-yr survival ( <i>n</i> = 65) | 1-yr mortality ( <i>n</i> = 59) | <i>p</i> value |
|-----------------------------------------|--------------------------------|---------------------------------|----------------|
| Age (years)                             | 74 (66–82)                     | 79 (71–83)                      | 0.094          |
| Male (%)                                | 31 (47.7)                      | 38 (64.4)                       | 0.061          |
| Body mass index (kg/m <sup>2</sup> )    | 22.3 (19.5–24.9)               | 20.2 (17.9–23.4)                | 0.014          |
| Before admission (%)                    |                                |                                 |                |
| Nursing home or hospital                | 14 (21.5)                      | 15 (25.4)                       | 0.610          |
| Bedridden status                        | 14 (21.5)                      | 15 (25.4)                       | 0.610          |
| Tube feeding                            | 13 (20.0)                      | 16 (27.1)                       | 0.350          |
| SOFA score                              | 7 (5–10)                       | 9 (7–12)                        | 0.014          |
| ProVent 14                              | 2 (2–2)                        | 2 (2–3)                         | 0.096          |
| Charlson Comorbidity Index              | 4 (3–5)                        | 4 (3–5)                         | 0.383          |
| Comorbidities (%)                       |                                |                                 |                |
| Diabetes                                | 5 (7.7)                        | 6 (10.2)                        | 0.628          |
| Hypertension                            | 7 (10.8)                       | 5 (8.5)                         | 0.666          |
| Chronic lung disease                    | 6 (9.2)                        | 6 (10.2)                        | 0.860          |
| Chronic kidney disease                  | 1 (1.5)                        | 5 (8.5)                         | 0.101          |
| Chronic liver disease                   | 1 (1.5)                        | 1 (1.7)                         | 1.000          |
| Cardiovascular disorder                 | 14 (21.5)                      | 10 (16.9)                       | 0.518          |
| Neurological disorder                   | 15 (23.1)                      | 15 (25.4)                       | 0.761          |
| Malignancy                              | 2 (3.1)                        | 4 (6.8)                         | 0.423          |
| Admission via ER (%)                    | 60 (92.3)                      | 49 (83.1)                       | 0.114          |
| Reason for ICU admission (%)            |                                |                                 | 0.752          |
| Sepsis/septic shock                     | 8 (12.3)                       | 10 (16.9)                       |                |
| Pneumonia                               | 23 (35.4)                      | 19 (32.2)                       |                |
| Cardiovascular disease                  | 2 (3.1)                        | 3 (5.1)                         |                |
| ARDS/acute respiratory failure          | 5 (7.7)                        | 8 (13.6)                        |                |
| Post-cardiac arrest care                | 21 (32.3)                      | 14 (23.7)                       |                |
| Other                                   | 6 (9.2)                        | 5 (8.5)                         |                |
| Tracheostomy type (%)                   |                                |                                 | 0.903          |
| Surgical                                | 48 (73.8)                      | 43 (72.9)                       |                |
| Percutaneous dilatational tracheostomy  | 17 (26.2)                      | 16 (27.1)                       |                |
| Initial vital signs                     |                                |                                 |                |
| Systolic blood pressure (mmHg)          | 93 (89–106)                    | 95 (86–110)                     | 0.739          |
| Diastolic blood pressure (mmHg)         | 54 (48–60)                     | 54 (46–62)                      | 0.622          |
| Heart rate (/min)                       | 96 (81–112)                    | 92 (82–108)                     | 0.499          |
| Respiratory rate (/min)                 | 22 (20–26)                     | 23 (20–27)                      | 0.725          |
| Body temperature (°C)                   | 36.8 (36.5–37.5)               | 36.7 (36.3–37.0)                | 0.068          |
| Oxygen saturation (%)                   | 97 (95–99)                     | 97 (95–99)                      | 0.762          |
| Glasgow coma scale                      | 7 (5–10)                       | 7 (5–10)                        | 0.834          |
| PaO <sub>2</sub> /FiO <sub>2</sub>      | 182 (100–283)                  | 146 (76–249)                    | 0.149          |
| Time from MV to tracheostomy (days)     | 14 (8–18)                      | 12 (8–16)                       | 0.272          |
| Vasopressor (%)                         | 27 (41.5)                      | 36 (61.0)                       | 0.030          |
| CRRT (%)                                | 5 (7.7)                        | 13 (22.0)                       | 0.024          |
| Neuromuscular blocker (%)               | 3 (4.7)                        | 7 (11.9)                        | 0.193          |
| Laboratory findings                     |                                |                                 |                |
| White blood cells (×10 <sup>9</sup> /L) | 13.4 (8.8–17.2)                | 12.0 (8.2–17.1)                 | 0.296          |
| Platelet (×10 <sup>9</sup> /L)          | 227 (168–305)                  | 226 (148–315)                   | 0.647          |

|                                                  |                  |                  |        |
|--------------------------------------------------|------------------|------------------|--------|
| <b>Albumin (g/dL)</b>                            | 3.2 (2.8–3.6)    | 2.8 (2.4–3.3)    | 0.029  |
| <b>Creatinine (mg/dL)</b>                        | 0.77 (0.54–1.40) | 0.97 (0.64–1.75) | 0.079  |
| <b>C-reactive protein (mg/dL)</b>                | 68 (12–160)      | 108 (37–201)     | 0.074  |
| <b>Lactic acid (mmol/L)</b>                      | 1.7 (0.9–2.9)    | 1.9 (1.1–3.8)    | 0.371  |
| <b>At discharge (%)</b>                          |                  |                  |        |
| <b>Transferred to a nursing home or hospital</b> | 44 (67.7)        | 56 (94.9)        | <0.001 |
| <b>Tube feeding</b>                              | 40 (61.5)        | 54 (91.5)        | <0.001 |
| <b>Decannulation of tracheostomy tube</b>        | 19 (29.2)        | 6 (10.2)         | 0.008  |
| <b>Length of hospital stay (days)</b>            | 77 (42–107)      | 59 (37–94)       | 0.136  |
| <b>Duration of ICU stay (days)</b>               | 27 (18–51)       | 31 (23–56)       | 0.228  |
| <b>Duration of MV (days)</b>                     | 20 (12–29)       | 24 (16–40)       | 0.082  |
| <b>Duration of MV and HMV (days)</b>             | 21 (12–33)       | 26 (16–64)       | 0.034  |

The data are shown as the median (IQR) or number (%).

SOFA=Sequential Organ Failure Assessment; ER=emergency room; ICU=intensive care unit; ARDS=acute respiratory distress syndrome; PaO<sub>2</sub>=partial pressure of oxygen; FiO<sub>2</sub>=fraction of inspired oxygen; MV=mechanical ventilation; CRRT=continuous renal replacement therapy; and HMV=home mechanical ventilation.
